# Supplementary material for: Nitrate removal studies on polyurea membrane using nanofiltration system – membrane characterization and model development
Source: publisher site journal article supplement (doi:10.1515/cppm-2020-0041), 2020-09-21
Supplement: Supplementary file 1 [file j_cppm-2020-0041_suppl.docx]

**Appendix**

**Various model equations used for estimating membrane transport parameters**

**Kedem-Katchalsky model** [47]

Solvent flux, *Jw*: ………….. (21)

Solute flux, *Js*: ………….. (22)

where

*ΔP* is hydraulic pressure difference and *Δπs* is the osmotic pressure difference.

*Cf*, *Cm*, *Cp* are solute concentrations at feed side, membrane, and the permeate side

is the logarithmic mean of *Cm* and *Cp*.

Model constants *Lp*, *σ*, *ω* are specific hydraulic permeability, reflection coefficient, and local solute permeability.

**Spiegler-Kedem model** [48]

Solute rejection, *R*: ….... (23a)

….... (23b)

where *P* represents solute permeability.

**Jitsuhara andKimura model for charged membranes** [41]

Reflection coefficient, σ for a negatively charged membrane [47]

…... (24)

where

Reflection coefficient, σ based on Jitsuhara and Kimura model is given by:

………….. (25)

where , ………….. (26)

*X* is the charge density of the membrane,

*ϕ* is osmotic coefficient, and *ϕX’* is effective charge density, *t* is the transport number [49],

and the superscripts *I* and *II* represent the higher and lower pressure sides.

The other transport parameter - solute permeability *P* is determined from:

………….. (27)

where, *ϕw* is the water content of the membrane, *k2* is tortuosity factor,

ϕw/k2ΔX is the parameter used instead of numerous individual parameters *ϕ*, *X’*, *k2*, *ΔX* [50].

**Combined film theory Spiegler-Kedem (CFSK) model:**

Observed solute rejection, *Robs*

………….. (28)

where *k* the coefficient of mass transfer.

Observed solute rejection, *Robs* [51] is given by:

…………..(29)

After simplication *Robs* [33] can represented as:

…………..(30)

…………..(31a)

…………..(31b)

with maximum rejection observed at:

…………..(32)

where *Pe* is peclet number given by:

…………..(33)

*Jw,min* is the point where the rejection will be maximum and is equal to the mass transfer coefficient *k.*
